# Supplementary material for: “I Need the Company of My Peers”: A Mixed-method Study Among Community-dwelling Elderly in China Running Title: I Need the Company of My Peers
Source: Research Square preprint supplement (doi:10.21203/rs.3.rs-646220/v1), 2021-06-25
Supplement: Supplementary file 1 [file 105962e0fa973d8c63fe5862.docx]

**Supplement 2 Interview guide**

| Research questions | Probing question |
| --- | --- |
| What is the experience of the general social participation with peers? | How do you usually spend your time from morning to night? |
| Which age group/What kind of person do you like to interact with most? Why? |
| What are the usual social activities with peers? |
| Where to have these peer activities? |
| Number of peers? |
| Contact frequency? |
| What made you decide to engage with people of your age? |
| What are perspectives and attitude towards peer interaction? | How important do you think of peer interaction? Why is that? |
| How do you feel before, during or after interacting with peers? |
| Are you satisfied with your current peer relationship? If no why? If yes what? |
| Do you think that getting along with your peers will affect you or bring you any changes? If yes what? If no why? |
| Could anything be added/changed to improve the peer interaction? If yes what? |
| Any other comments? | What else do you want to add? |

**Appendix 3**

**Consolidated criteria for reporting qualitative studies (COREQ): 32-item checklist**

Developed from:

Tong A, Sainsbury P, Craig J. Consolidated criteria for reporting qualitative research (COREQ): a 32-item checklist for interviews and focus groups. *International Journal for Quality in Health Care*. 2007. Volume 19, Number 6: pp. 349 – 357

| **No. Item** | **Guide questions/description** | **Reported on Page #** |
| --- | --- | --- |
| **Domain 1: Research team and reﬂexivity** |  |  |
| *Personal Characteristics* |  |  |
| 1. Interviewer/facilitator | Which author/s conducted the interview or focus group? | Data collection |
| 2. Credentials | What were the researcher’s credentials? E.g. PhD, MD | Data collection |
| 3. Occupation | What was their occupation at the time of the study? | Data collection |
| 4. Gender | Was the researcher male or female? | Data collection |
| 5. Experience and training | What experience or training did the researcher have? | Data collection |
| *Relationship with participants* |  |  |
| 6. Relationship established | Was a relationship established prior to study commencement? | Participants |
| 7. Participant knowledge of the interviewer | What did the participants know about the researcher? e.g. personal goals, reasons for doing the research | Data collection |
| 8. Interviewer characteristics | What characteristics were reported about the inderviewer/facilitator? e.g. Bias, assumptions, reasons and interests in the research topic | Data Analysis |
| **Domain 2: study design** |  |  |
| *Theoretical framework* |  |  |
| 9. Methodological orientation and Theory | What methodological orientation was stated to underpin the study? e.g. grounded theory, discourse analysis, ethnography, phenomenology, content analysis | Data Analysis |
| *Participant selection* |  |  |
| 10. Sampling | How were participants selected? e.g. purposive, convenience, consecutive, snowball | Participants |
| 11. Method of approach | How were participants approached? e.g. face-to-face, telephone, mail, email | Data collection |
| 12. Sample size | How many participants were in the study? | Participants |
| 13. Non-participation | How many people refused to participate or dropped out? Reasons? | Participants |
| *Setting* |  |  |
| 14. Setting of data collection | Where was the data collected? e.g. home, clinic, workplace | Data collection |
| 15. Presence of non-participants | Was anyone else present besides the participants and researchers? | No, Data collection |
| 16. Description of sample | What are the important characteristics of the sample? e.g. demographic data, date | Participants |
| *Data collection* |  |  |
| 17. Interview guide | Were questions, prompts, guides provided by the authors? Was it pilot tested? | Additional file and Data collection |
| 18. Repeat interviews | Were repeat interviews carried out? If yes, how many? | No |
| 19. Audio/visual recording | Did the research use audio or visual recording to collect the data? | Data collection |
| 20. Field notes | Were ﬁeld notes made during and/or after the interview or focus group? | Data collection |
| 21. Duration | What was the duration of the interviews or focus group? | Data collection |
| 22. Data saturation | Was data saturation discussed? | Participants |
| 23. Transcripts returned | Were transcripts returned to participants for comment and/or correction? | No. Data Analysis |
| **Domain 3: analysis and ﬁndings** |  |  |
| *Data analysis* |  |  |
| 24. Number of data coders | How many data coders coded the data? | Page 6 |
| 25. Description of the coding tree | Did authors provide a description of the coding tree? | Results and Figure 1 |
| 26. Derivation of themes | Were themes identiﬁed in advance or derived from the data? | Data Analysis |
| 27. Software | What software, if applicable, was used to manage the data? | Not applicable |
| 28. Participant checking | Did participants provide feedback on the ﬁndings? | No. Data Analysis |
| *Reporting* |  |  |
| 29. Quotations presented | Were participant quotations presented to illustrate the themes/ﬁndings? Was each quotation identiﬁed? e.g. participant number | Results |
| 30. Data and ﬁndings consistent | Was there consistency between the data presented and the ﬁndings? | Yes, Results |
| 31. Clarity of major themes | Were major themes clearly presented in the ﬁndings? | Yes. Results and Figure 1 |
| 32. Clarity of minor themes | Is there a description of diverse cases or discussion of minor themes? | Yes, Results |
