# Supplementary material for: “I Need the Company of My Peers”: A Mixed-method Study Among Community-dwelling Elderly in China Running Title: I Need the Company of My Peers
Source: Research Square preprint supplement (doi:10.21203/rs.3.rs-646220/v1), 2021-06-25
Supplement: Supplementary file 2 [file 58fc5cbbabf06250babe3f38.docx]

**Supplement 1**

**Social Network List** (Adapted from Hirsch 1979; Valente, 2010; LeBlanc, 2018).

*First, please list up to 5 persons with whom you have had the most contact in the last 3 months (list in the order from the most contact to the least contact). Next, I will ask you* ***several questions about each of the people you list starting with the first person (Person 1).*** *To protect the confidentiality, instead of using each persons’ full name, please define them by their Family name only or a number (1-5).*

|  | Person1 | Person 2 | Person 3 | Person 4 | Person 5 |
| --- | --- | --- | --- | --- | --- |
| Family Name（Nickname） |  |  |  |  |  |
| 1.Gender (Female, Male) |  |  |  |  |  |
| 2.Age |  |  |  |  |  |
| 3.Role（1=spouse，2=child，3= grandchildren's generation，4=parent，5=relatives，6=friend，7=neighbor，8=colleges，9=schoolmate，10=acquaintance，11=nanny，12=healthcare staff，13=social worker/volunteer） |  |  |  |  |  |
| 4. Do you help each other? (1=Yes, 0=No） |  |  |  |  |  |
| 5.Does this person live within an hour’s drive (yes or no)? How many minutes’ drive? | Yes  No  Time: | Yes  No  Time: | Yes  No  Time: | Yes  No  Time: | Yes  No  Time: |
| 6. How close are you to this person? (on a scale of 1-3 – 1 being the closest, 2=somewhat close; 3= not close) |  |  |  |  |  |
| 7. How long have you known this person (in years)? |  |  |  |  |  |
| 8. How often do you interact (1=daily, 2=once per week or more often, 3=once per month or more often, 4=once per year or more often, 5=irregularly)? |  |  |  |  |  |
| 9. How do you typically interact? (1=in person; 2=phone or text message; 3=Wechat; 4=other) |  |  |  |  |  |
| 10. When you need help, do you ask (name) for help? | Yes  No | Yes  No | Yes  No | Yes  No | Yes  No |
